# Supplementary figures and images for: Internalization of Salmonella in Leafy Vegetables during Postharvest Conditions
Source: MDPI journal article supplement (doi:10.3390/foods12163106), 2023-08-18

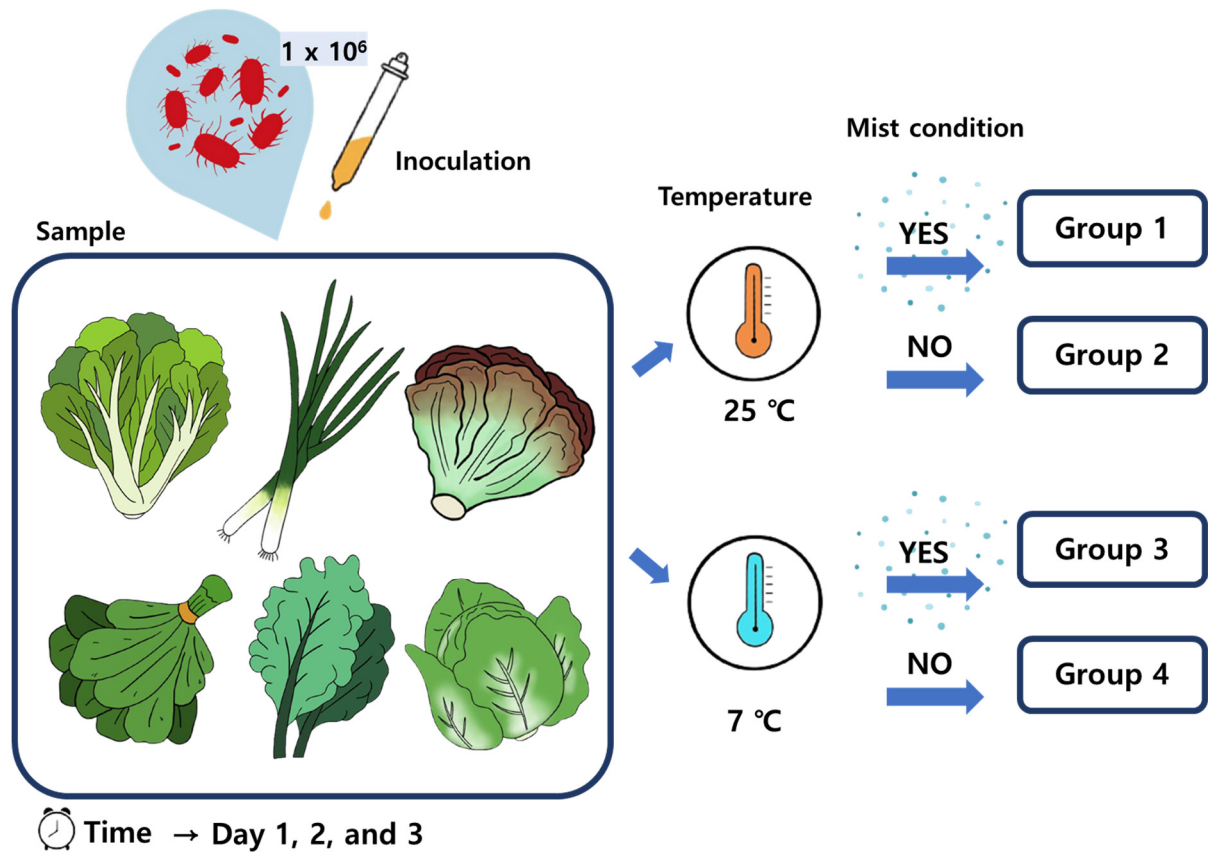

**Figure S1.** Summary of the study design

Supplement: s1 [file s1]
